# Supplementary figures and images for: Covalent functionalization of TiO2 nanotube arrays with EGF and BMP-2 for modified behavior towards mesenchymal stem cells
Source: Royal Society of Chemistry journal article supplement (doi:10.1039/c0ib00155d), 2011-01-01

**Supplementary Information**

**Figure S1**

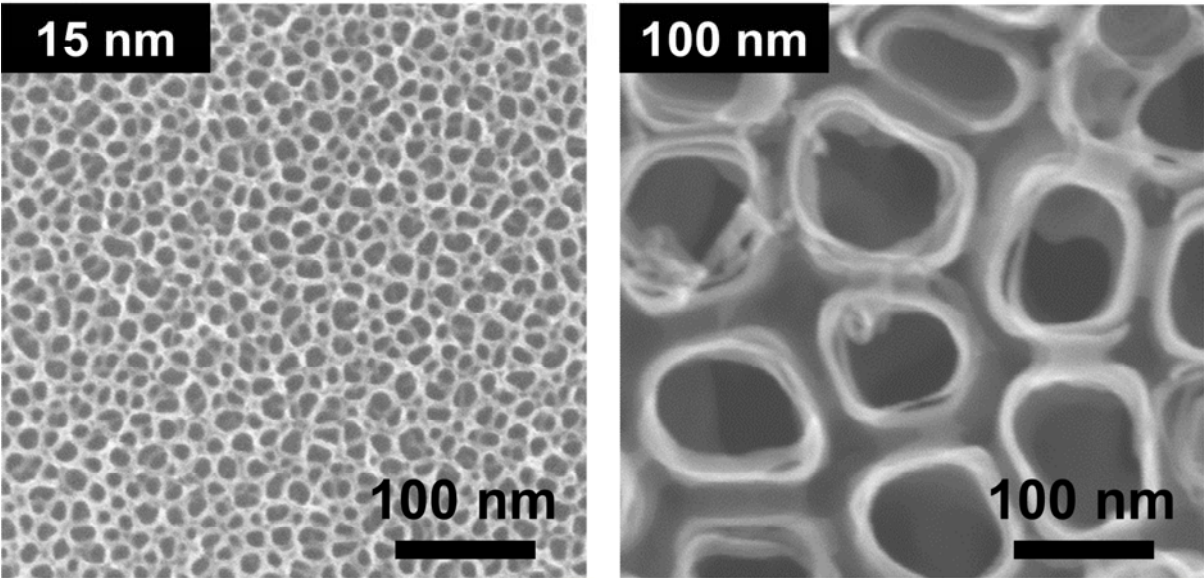

**Figure S2**

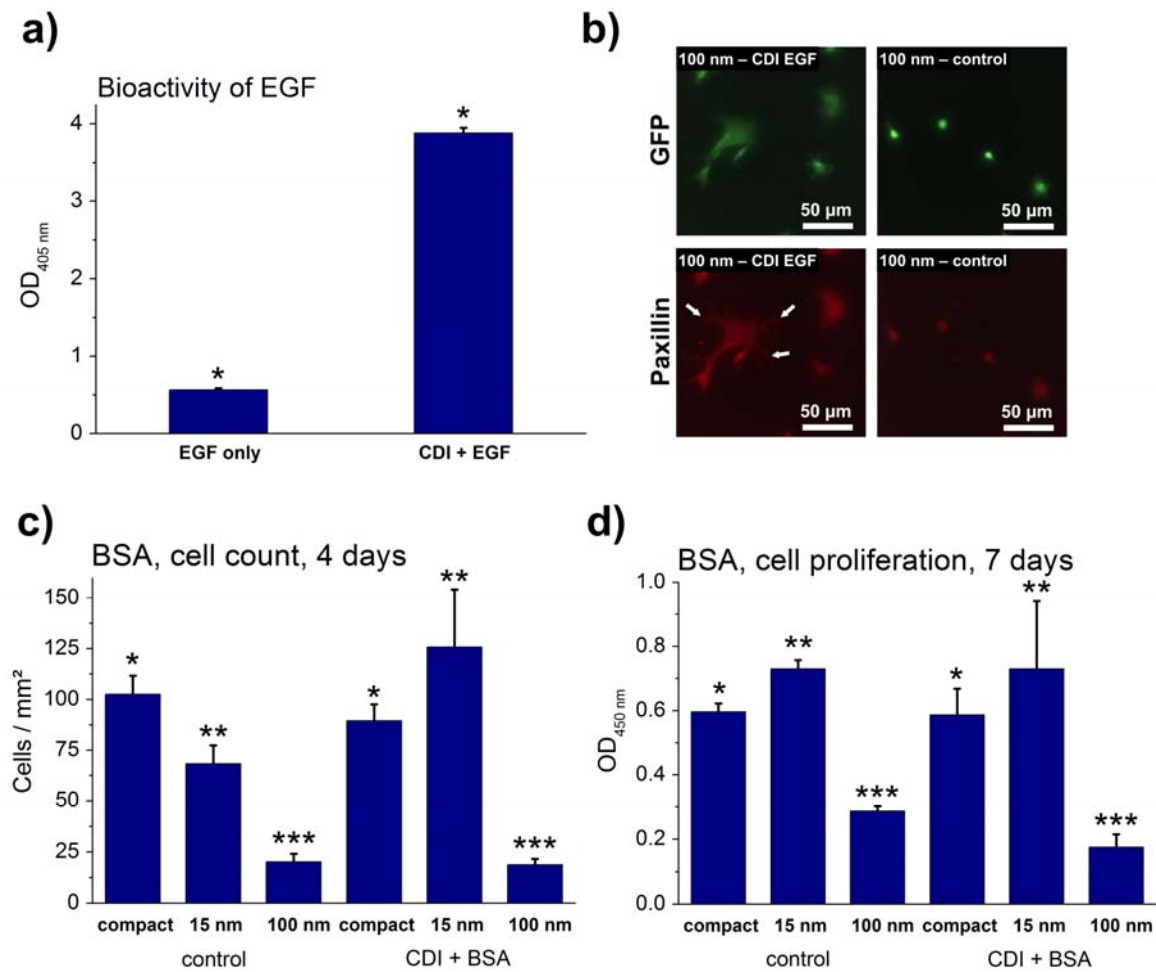

Supplement: c0ib00155d.pdf [file c0ib00155d.pdf]
